# Supplementary material
Source: publisher figshare collection journal article supplement (https://frontiersin.figshare.com/ndownloader/files/10529875)
Supplement: Supplementary file [file 10529875]

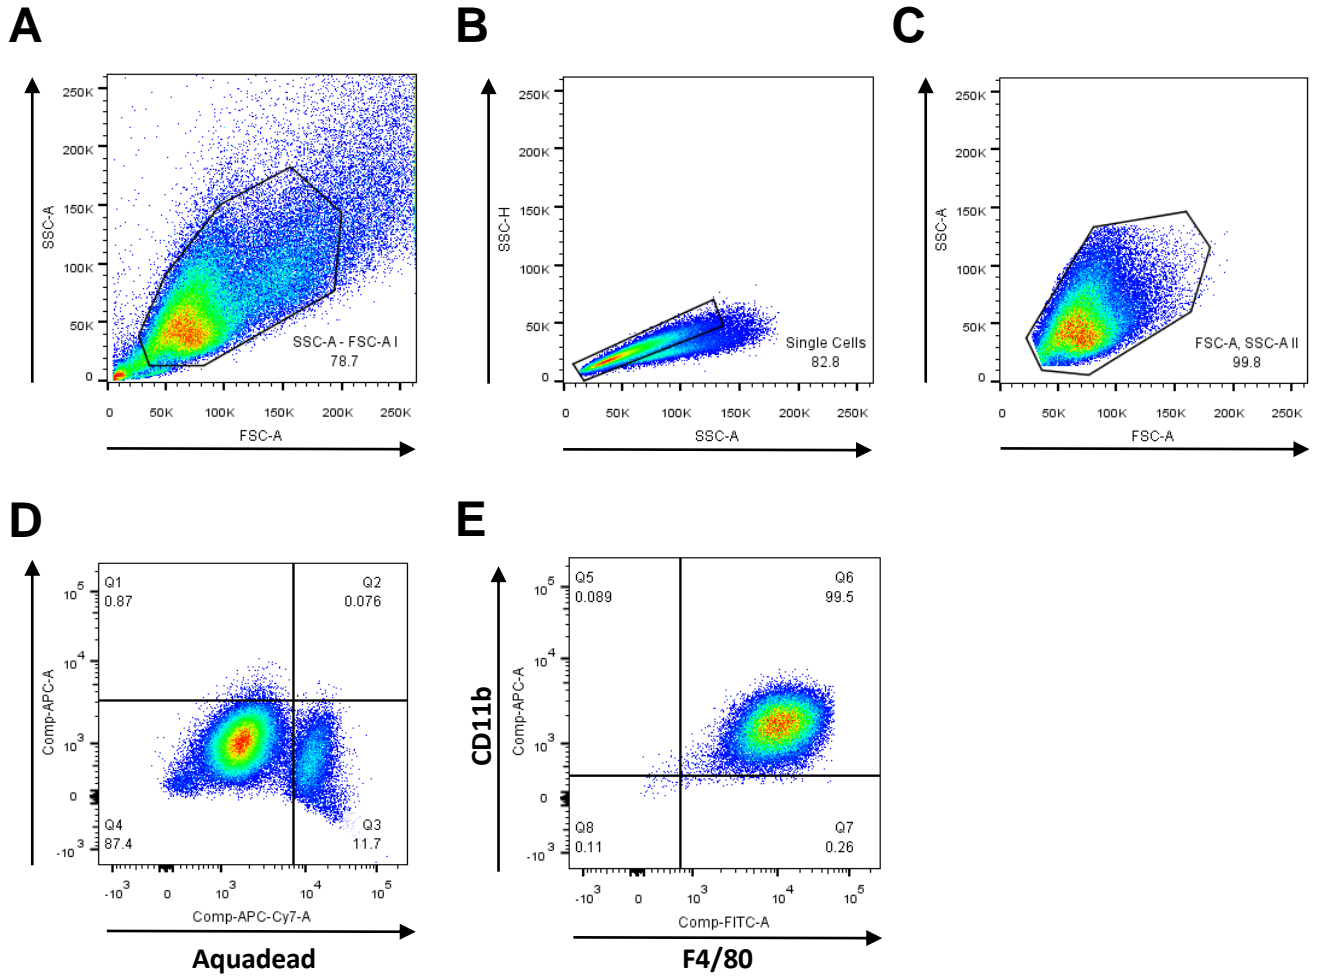

**Figure S1. Gating strategy for BMDM FACS analysis assessed by FlowJo software. (A) FSC-SSC > (B) Single cells > (C) Single cells > (D) Live/ Dead Aqua stain > (E) F4/80+; CD11b+. BMDM from Balb/c and C57BL6 mice were collected and stained with aquadead (life/dead discrimination), anti-F480 (PE) and anti-CD11b (APC) mAbs for purity determination and different techniques.**
